# Supplementary material for: Synthesis of 6H-benzo[c]chromene as a new electron-rich building block of conjugated alternating copolymers and its application to polymer solar cells
Source: Royal Society of Chemistry journal article supplement (doi:10.1039/c4ta02929a), 2014-01-01
Supplement: c4ta02929a1.pdf [file c4ta02929a1.pdf]

## Supplementary Information

# **Synthesis of 6*H*-benzo[*c*]chromene as a new electron-rich building block of conjugated alternating copolymers and its application to polymer solar cells<sup>†</sup>**

Jong Won Lee, Seunghwan Bae and Won Ho Jo\*

Department of Materials Science and Engineering, Seoul National University, 1 Gwanak-ro, Gwanak-gu, Seoul 151-744, Korea

**Table S1.** Photovoltaic properties of PBCTBT:PC<sub>71</sub>BM under standard AM 1.5G illumination cast from DCB with 2 vol% DIO.

| PBCDTBT:<br>PC <sub>71</sub> BM (w/w) | $V_{OC}$<br>(V) | $J_{SC}$<br>(mA/cm <sup>2</sup> ) | FF   | PCE<br>(%) |
|---------------------------------------|-----------------|-----------------------------------|------|------------|
| 1:4                                   | 0.85            | 4.02                              | 0.39 | 1.27±0.05  |
| 1:3                                   | 0.84            | 6.75                              | 0.43 | 2.30±0.10  |
| 1:2                                   | 0.84            | 9.04                              | 0.48 | 3.60±0.12  |
| 1:1                                   | 0.85            | 6.73                              | 0.37 | 2.08±0.05  |

**Table S2.** Photovoltaic properties of PBCDTBT:PC<sub>71</sub>BM under standard AM 1.5G illumination cast from CF and DCB mixture solvent (CF:DCB=1:2) with 2 vol% DIO.

| PBCDTBT:<br>PC <sub>71</sub> BM (w/w) | $V_{OC}$<br>(V) | $J_{SC}$<br>(mA/cm <sup>2</sup> ) | FF   | PCE<br>(%) |
|---------------------------------------|-----------------|-----------------------------------|------|------------|
| 1:3                                   | 0.83            | 8.88                              | 0.47 | 3.46±0.11  |
| 1:2                                   | 0.87            | 11.10                             | 0.48 | 4.63±0.17  |
| 1:1.5                                 | 0.87            | 12.51                             | 0.52 | 5.56±0.14  |
| 1:1                                   | 0.84            | 10.68                             | 0.45 | 4.04±0.13  |

**Table S3.** Photovoltaic properties of PBCDPP2T:PC<sub>71</sub>BM under standard AM 1.5G illumination cast from DCB with 4 vol% DIO.

| PBCDTBT:<br>PC <sub>71</sub> BM (w/w) | $V_{OC}$<br>(V) | $J_{SC}$<br>(mA/cm <sup>2</sup> ) | FF   | PCE<br>(%) |
|---------------------------------------|-----------------|-----------------------------------|------|------------|
| 1:4                                   | 0.78            | 3.36                              | 0.43 | 1.11±0.09  |
| 1:3                                   | 0.78            | 5.79                              | 0.45 | 2.01±0.15  |
| 1:2                                   | 0.79            | 3.89                              | 0.47 | 1.46±0.12  |

**Table S4.** Calculated ground and excited state dipole moment of PFDTBT and PBCDTBT with DFT/TDDFT B3LYP/6-31G level using Gaussian 09.

| Dipole            | $\mu_x$ (D) | $\mu_y$ (D) | $\mu_z$ (D) | Total (D) | $\Delta\mu_{eg}$ (D) <sup>a</sup> |
|-------------------|-------------|-------------|-------------|-----------|-----------------------------------|
| $\mu_g$ , PFDTBT  | -0.7574     | -0.3529     | 0.0736      | 0.8388    | 7.9709                            |
| $\mu_e$ , PFDTBT  | -7.3490     | -4.8328     | -0.0580     | 8.7959    |                                   |
| $\mu_g$ , PBCDTBT | 0.6615      | -0.6416     | 0.2454      | 0.9536    | 9.3158                            |
| $\mu_e$ , PBCDTBT | -7.4460     | -5.2298     | 0.2063      | 9.1014    |                                   |

<sup>a</sup> $\Delta\mu_{eg}$  represents the difference between the ground and excited state dipole moments, as calculated by  $\Delta\mu_{eg}=[(\mu_{gx}-\mu_{ex})^2+(\mu_{gy}-\mu_{ey})^2+(\mu_{gz}-\mu_{ez})^2]^{1/2}$ .

**Table S5.** Calculated ground and excited state dipole moment of PFDPP2T and PBCDPP2T with DFT/TDDFT B3LYP/6-31G level using Gaussian 09.

| Dipole             | $\mu_x$ (D) | $\mu_y$ (D) | $\mu_z$ (D) | Total (D) | $\Delta\mu_{eg}$ (D) <sup>a</sup> |
|--------------------|-------------|-------------|-------------|-----------|-----------------------------------|
| $\mu_g$ , PFDPP2T  | 1.4228      | 0.1144      | 0.0806      | 1.4296    | 0.4973                            |
| $\mu_e$ , PFDPP2T  | 0.9381      | 0.2200      | 0.0445      | 0.9645    |                                   |
| $\mu_g$ , PBCDPP2T | -0.0421     | -0.2382     | -1.0961     | 1.1224    | 2.0865                            |
| $\mu_e$ , PBCDPP2T | -0.5253     | -0.3425     | 0.9310      | 1.1225    |                                   |

<sup>a</sup> $\Delta\mu_{eg}$  represents the difference between the ground and excited state dipole moments, as calculated by  $\Delta\mu_{eg}=[(\mu_{gx}-\mu_{ex})^2+(\mu_{gy}-\mu_{ey})^2+(\mu_{gz}-\mu_{ez})^2]^{1/2}$ .

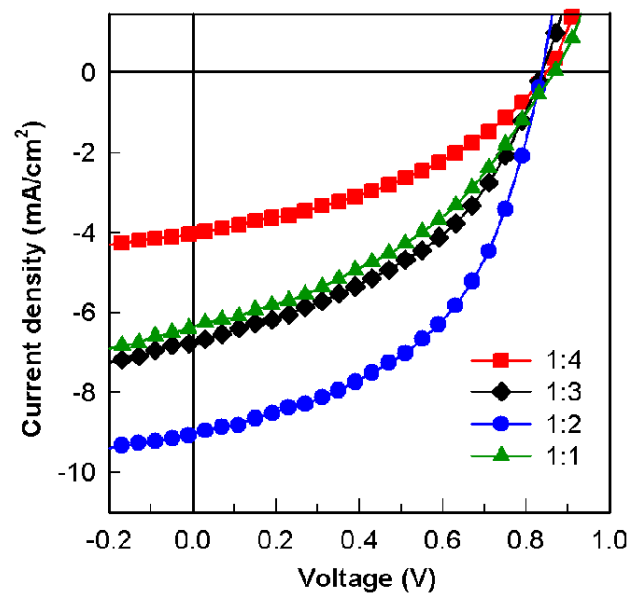

**Fig. S1**  $J$ - $V$  curves of PBCDTBT/PC<sub>71</sub>BM BHJ solar cells under AM 1.5G, 100 mW/cm<sup>2</sup> cast from DCB with 2 vol% DIO.

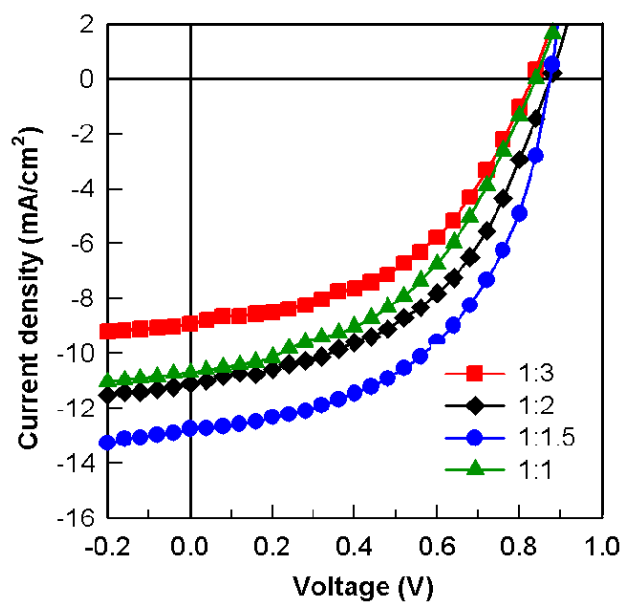

**Fig. S2**  $J$ - $V$  curves of PBCDTBT/PC<sub>71</sub>BM BHJ solar cells under AM 1.5G, 100 mW/cm<sup>2</sup> cast from CF and DCB mixture solvent (CF:DCB=1:2) with 2 vol% DIO.

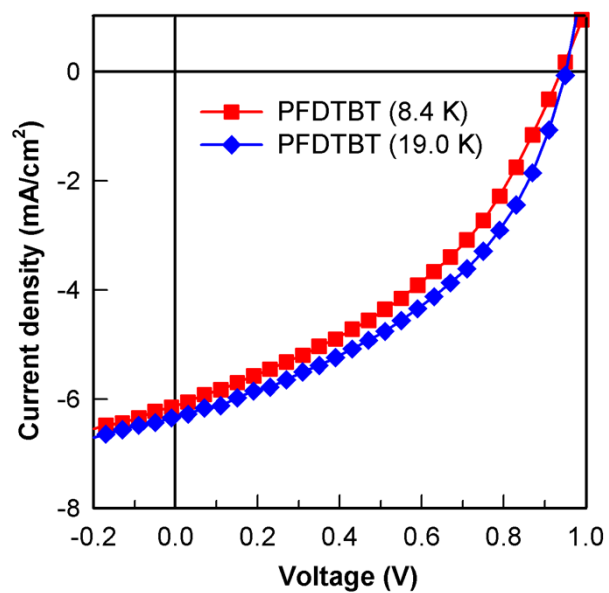

**Fig. S3**  $J$ - $V$  curves of BHJ solar cells fabricated from two PFDTBTs with different molecular weights blended with PC<sub>71</sub>BM under AM 1.5G, 100 mW/cm<sup>2</sup>.

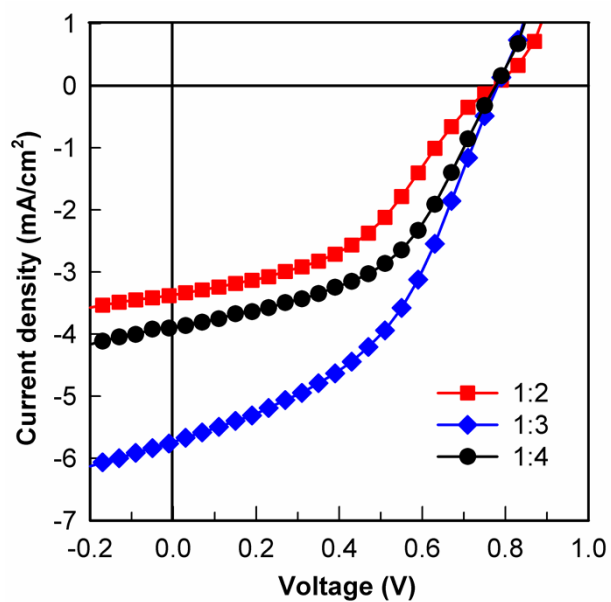

**Fig. S4**  $J$ - $V$  curves of PBCDPP2T/PC<sub>71</sub>BM BHJ solar cells under AM 1.5G, 100 mW/cm<sup>2</sup> cast from DCB with 4 vol% DIO.

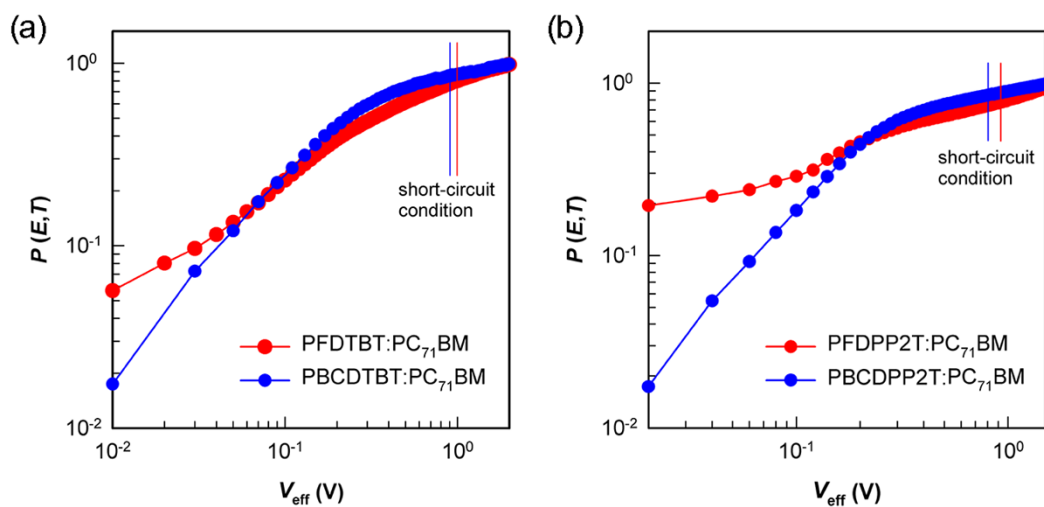

**Fig. S5** Exciton dissociation probability ( $P(E, T)$ ) plotted against effective voltage for DTBT-based polymers/PC<sub>71</sub>BM devices (a) and DPP-based polymers/PC<sub>71</sub>BM (b) under optimized condition.



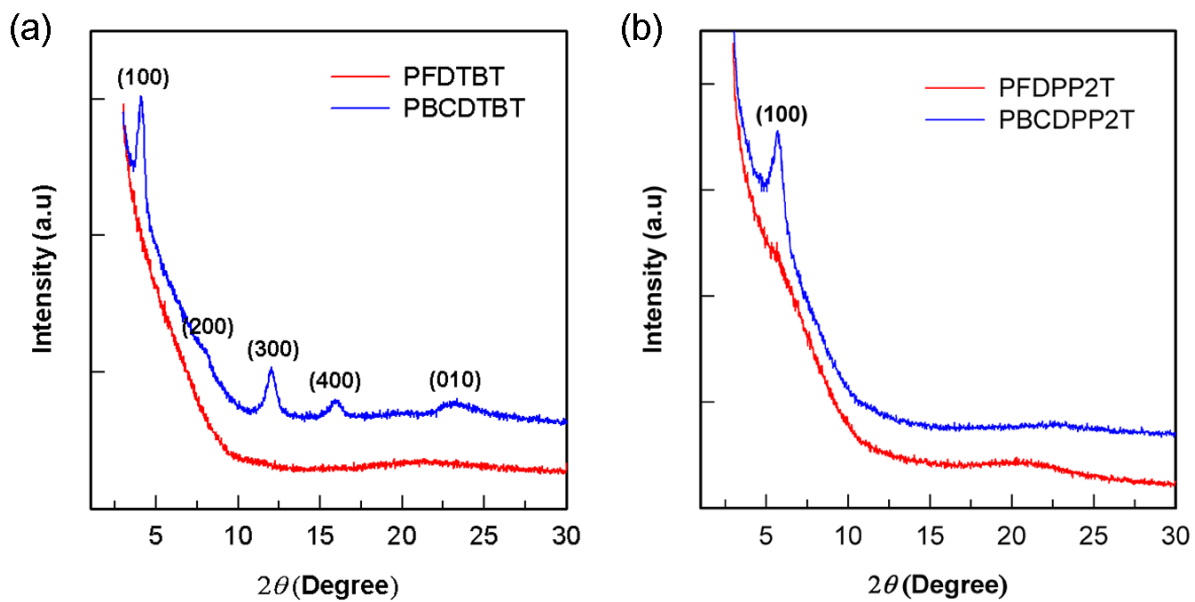

**Fig. S6** XRD diffractograms of DTBT-based polymers (a) and DPP-based polymers (b) in thin film.

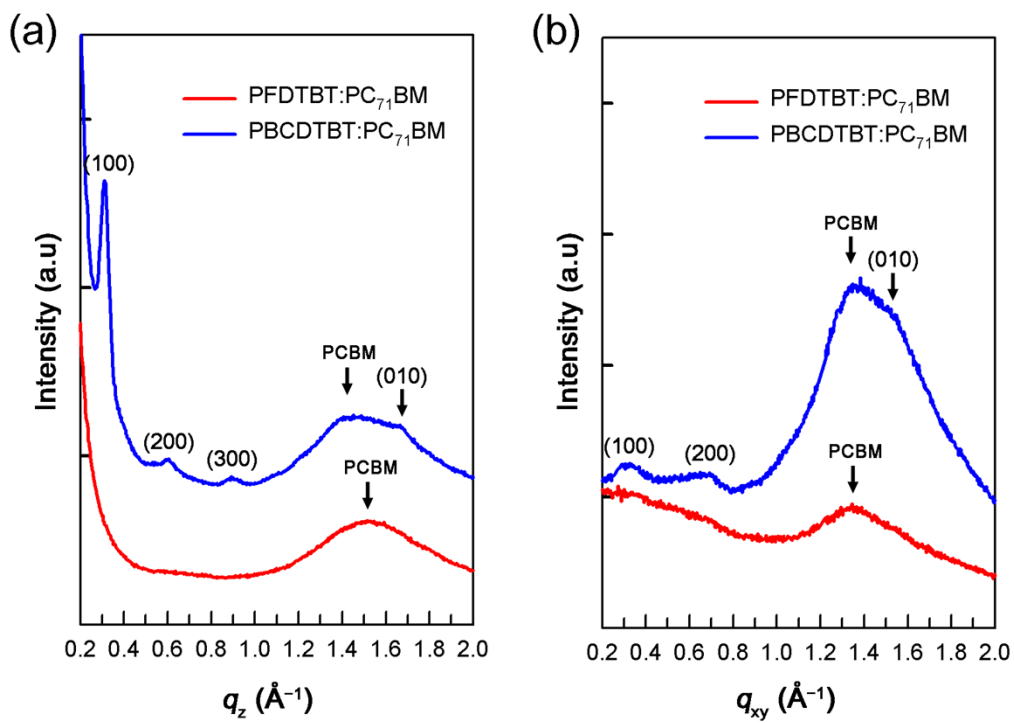

**Fig. S7** GIWAXS patterns of blend thin film under optimized condition: out-of-plane (a) and in-plane scan (b).

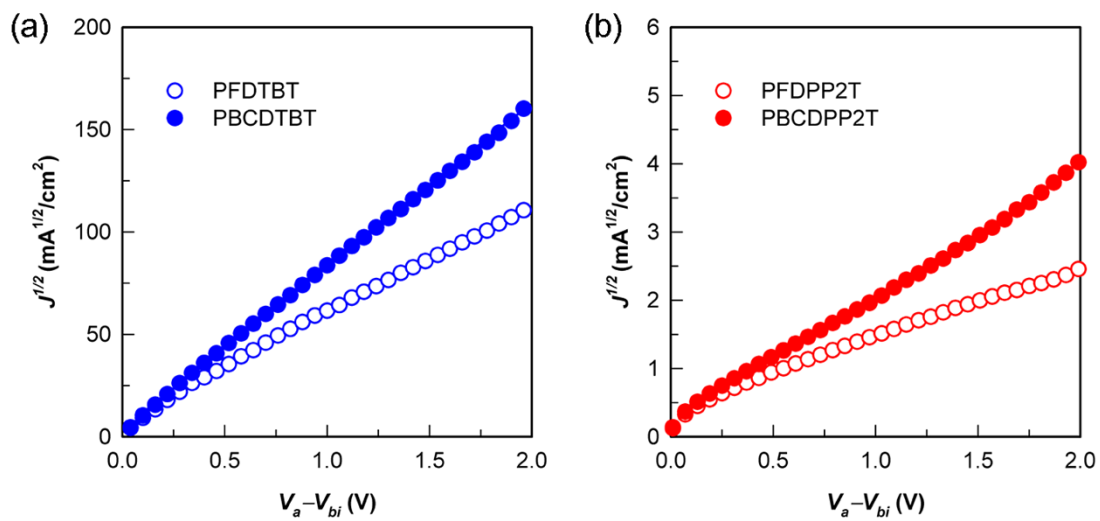

**Fig. S8** Dark  $J-V$  characteristics of pristine DTBP-based polymers (a) and DPP-based polymers (b) with hole-only device.
